# Supplementary material
Source: Springer Nature journal article supplement (https://www.springermedizin.de/resource/supplementary/13054_2004_2953_MOESM5_ESM.pdf/9719416)

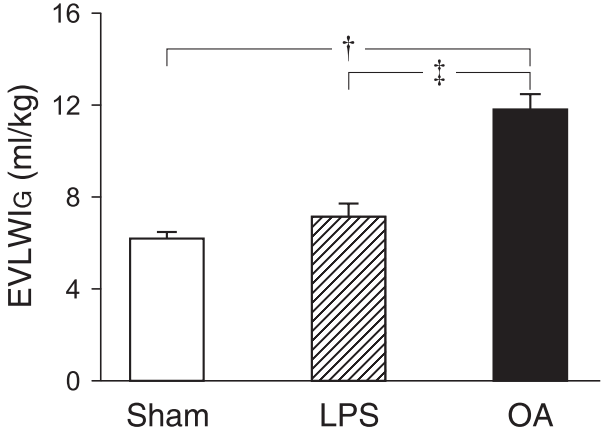

Supplement: MOESM5 [file 9719416]
